# Supplementary material for: Temporal retinal transcriptome and systems biology analysis identifies key pathways and hub genes in Staphylococcus aureus endophthalmitis
Source: Sci Rep. 2016 Feb 11;6:21502. doi: 10.1038/srep21502 (PMC4749995; doi:10.1038/srep21502)

## Supplementary Document

### Temporal retinal transcriptome and systems biology analysis identifies key pathways and hub genes in *Staphylococcus aureus* endophthalmitis

#### Authors:

Deepa Rajamani<sup>4†</sup>, Pawan Kumar Singh<sup>1,2†</sup>, Bruce G. Rottmann<sup>2</sup>, Natasha Singh<sup>3</sup>, Manoj K. Bhasin<sup>3</sup>, and Ashok Kumar<sup>1, 2, 3\*</sup>

† First author/equal contribution

#### Affiliations:

<sup>1</sup> Kresge Eye Institute, Wayne State University, Detroit, MI

<sup>2</sup> Department of Anatomy and Cell Biology, Wayne State University, Detroit, MI

<sup>3</sup> Department of Immunology & Microbiology, Wayne State University, Detroit, MI

<sup>4</sup> BIDMC Genomics, Proteomics, Bioinformatics and Systems Biology Center,  
Harvard Medical School, Boston, MA

#### \*Corresponding Author

Ashok Kumar, Ph.D.

E-mail: [akuma@med.wayne.edu](mailto:akuma@med.wayne.edu)

Manoj K. Bhasin, Ph.D.

E-mail: [mbhasin@bidmc.harvard.edu](mailto:mbhasin@bidmc.harvard.edu)

#### Supplementary Figure Legends:

**Figure S1. Differentially expressed genes identified from supervised analyses of SA post-infection data.** **A.** Venn Diagram comparing significantly differentially expressed genes identified from the following comparisons: controls vs. 3h post-infection, controls vs. 12h post-infection, and controls vs. 24h post-infection. The genes were selected using supervised analysis on the basis Absolute Fold Change (AFC) and  $p$  value ( $\text{AFC} > 1.5$ ,  $p < 0.05$ ) by pairwise comparison of the groups. The analysis was performed on preprocessed data by filtering low-expressing probes on the basis of absolute intensity (intensity  $< 40$  in all samples). **B.** Heatmap of 1,434 genes commonly differentially expressed among different post-infection time points compared to controls. Columns represent the samples and rows represent genes. Gene expression levels are shown as a pseudocolor scale (-1 to 1) with red denoting a high expression level and green denoting a low expression level. **C.** GO clusters of biological processes and metabolic functions significantly enriched in 1,434 genes commonly differentially expressed among different post-infection time points compared to controls. A GO enrichment score of 1.3 is equivalent to linear  $p$  value of 0.05.

**Figure S2: Functional and Gene Ontology Enrichment analysis of constitutively and temporally altered genes post-infection.** GO clusters of biological processes and metabolic functions significantly enriched in constitutive **(A)** and temporal **(B)** post-infection altered genes. Each bar represents a significantly enriched GO cluster, with significance shown as enrichment score on x-axis (Enrichment Score =  $-\log p$  value). **C)** Cologram of functional categories and disease that are significantly linked to temporal post-infection altered genes.

**Figure S3: Transcriptional profile of PAM3 treated samples (PAM3) and PAM3 pre-treated and SA infected samples (PAM3+SA).** **A)** Venn Diagram comparing significantly differentially expressed genes identified only in PAM3 treated samples without infection, or post-infection in PAM3 pre-treated samples. The analysis identified 85 commonly differentially expressed genes. **B)** Heatmap of 85 genes commonly differentially expressed in PAM3 treated and PAM3+SA samples. Columns represent samples and rows represent genes. Gene expression levels are shown on a pseudocolor scale (-1 to 1), with red denoting high expression levels and green

denoting low expression levels. **C)** Functional and disease enrichment analysis of genes that are commonly differentially expressed in PAM3 treated and PAM3+SA samples. Each bar represents a significantly enriched functional category. **D)** Pathway enrichment analysis of genes that are commonly differentially expressed in PAM3 treated and PAM3+SA samples.

**Figure S4: qRT-PCR analysis of regulatory molecules and their correlation with gene expression data.** C57BL/6 mice were intravitreally injected with *S. aureus* (SA) or Pam3Cys (either alone or 24h pre-infection) for the indicated time points. Total RNA was extracted, reverse transcribed, and subjected to qRT-PCR using specific primers for thirteen master regulators (IGF1, Jun, STAT3, NUPR1, CEBPB, CSF1, CyR61, EGFR1, SPP1, TGM2, IL-6, IL-1 $\beta$ , and CXCL2) genes, with glyceraldehyde 3-phosphate dehydrogenase (GAPDH) as the control. Modulations of gene expression were expressed as relative fold changes with respect to the GAPDH control. Statistical analysis was performed using one-way ANOVA for comparisons of control versus stimulated cells over time. Data points and bars represent the mean  $\pm$  the SD of triplicates from three independent experiments.

Supplementary Figures:

Figure S1

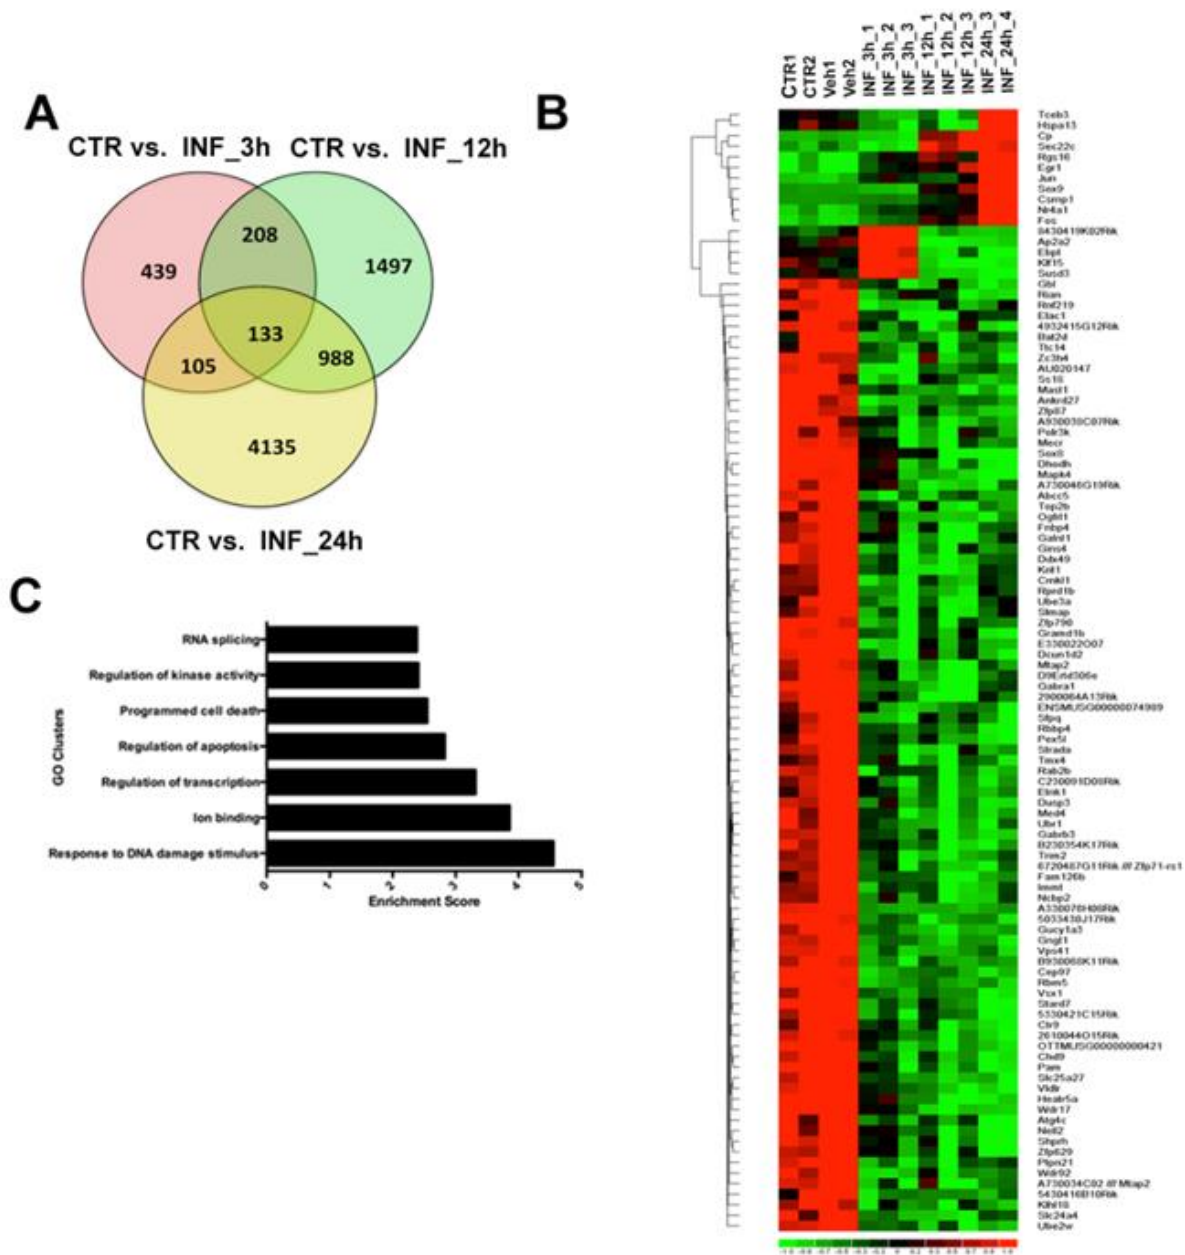

### Figure S2

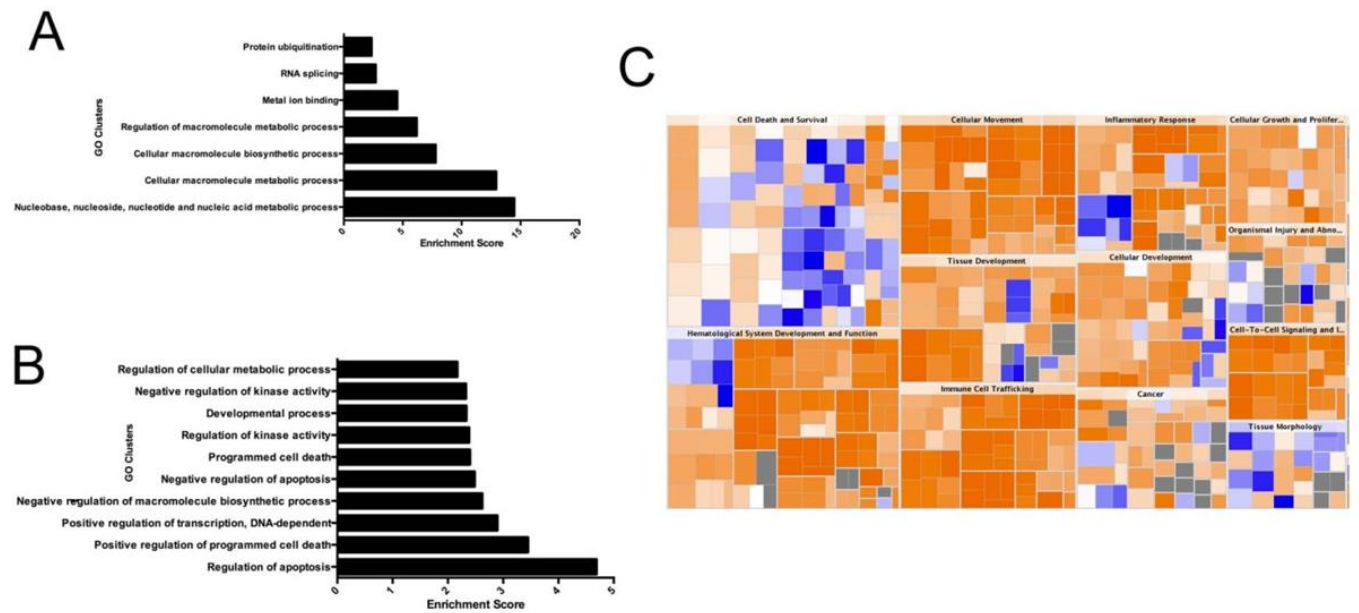

Figure S3

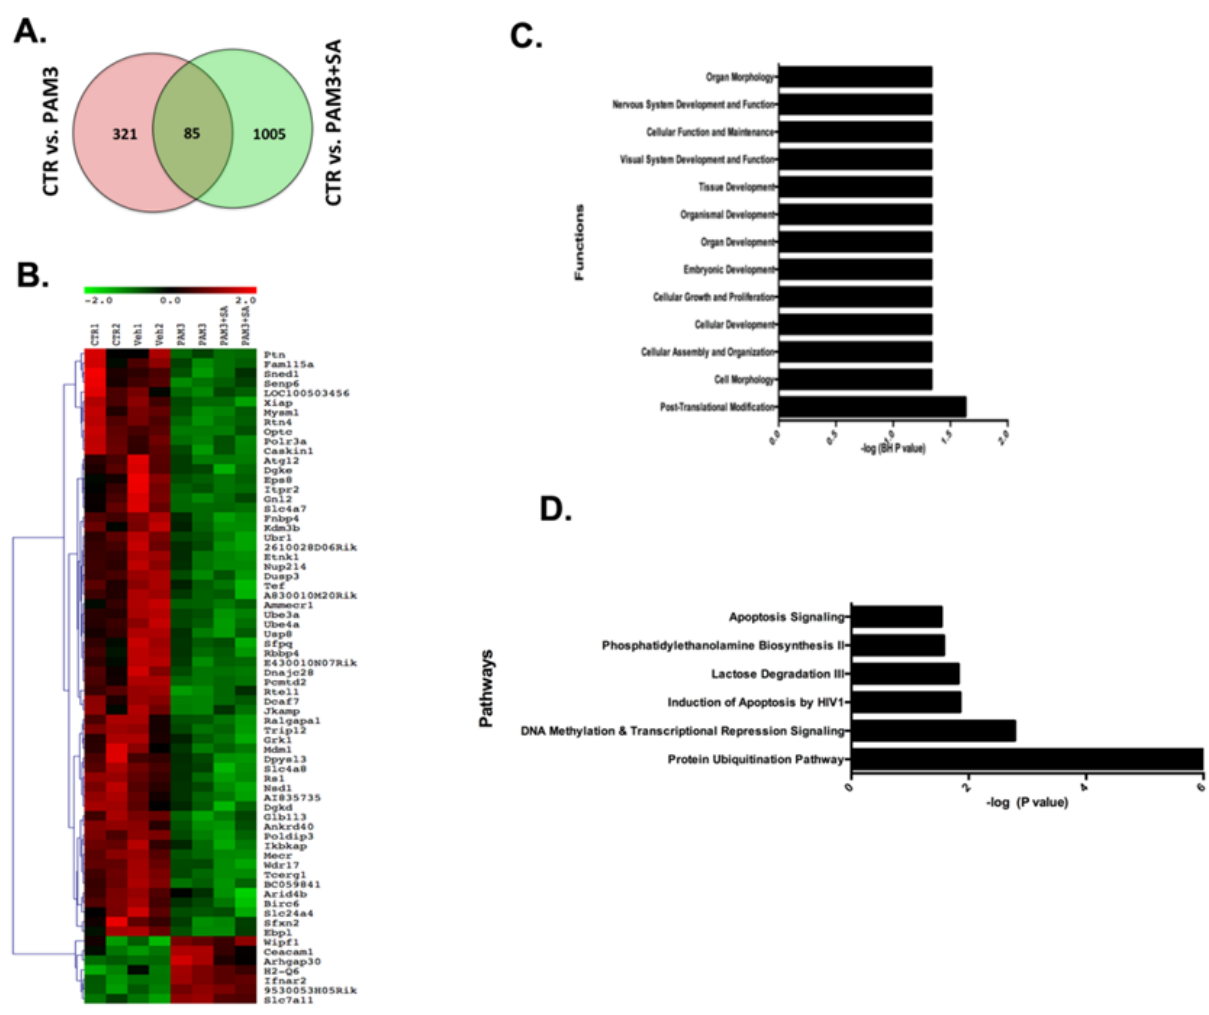

Figure S4

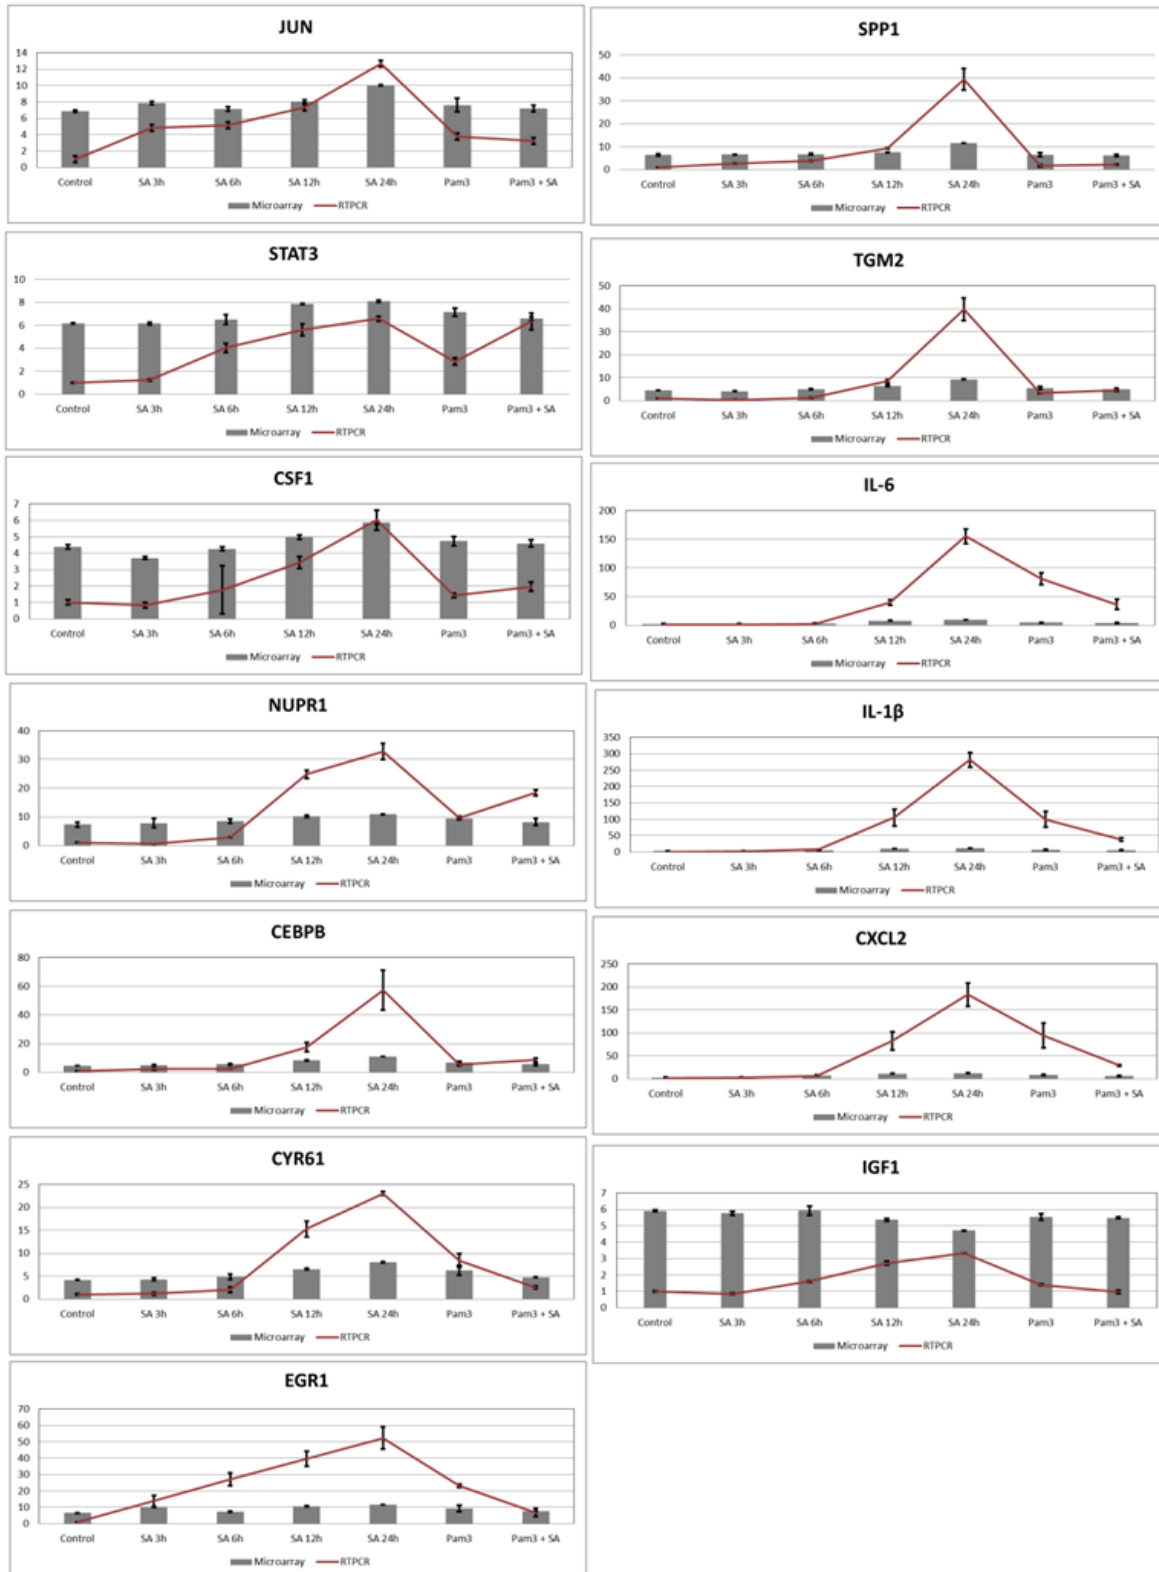

Supplement: Supplementary Information [file srep21502-s1.pdf]
